# Supplementary material
Source: PubMed Central journal article supplement (PMC3488276)
Supplement: NIHMS414646-supplement-Supplemental_data.pdf [file NIHMS414646-supplement-Supplemental_data.pdf]

Table (E)T-1. Correlations of GM density with objective memory performance and subjective complaints (N=120): Location of peak effects, Montreal atlas coordinates (mm), amplitude of effect (Z), cluster size (mm<sup>3</sup>), and significance level (p<.001).

| Region and Brodmann Area (BA) <sup>a</sup>                | x,y,z      | Z    | size (mm <sup>3</sup> ) | p     |
|-----------------------------------------------------------|------------|------|-------------------------|-------|
| Verbal Memory Performance (Composite Score <sup>b</sup> ) |            |      |                         |       |
| Right inferior frontal gyrus, BA47                        | 15 16 -22  | 4.26 | 483                     | <.001 |
| Left parahippocampal gyrus, BA27,<br>hippocampus          | -26 2 -18  | 3.52 | 266                     | <.001 |
| Left parahippocampal gyrus,<br>amygdala                   | -24 -30 -4 | 3.85 | 186                     | <.001 |
| Subjective Memory (Complaints Index <sup>b</sup> )        |            |      |                         |       |
| Right caudate tail                                        | 38 -26 -10 | 3.67 | 599                     | <.001 |
| Right hippocampus                                         | 27 -40 -4  | 3.62 |                         |       |
| Right sub-gyral                                           | 36 -34 -6  | 3.51 |                         |       |
| Right substantia nigra                                    | 10 -8 -12  | 3.68 | 242                     | <.001 |
| Right red nucleus                                         | 2 -16 -16  | 3.31 |                         |       |
| Right medial frontal gyrus, BA25                          | 6 27 -18   | 3.63 | 230                     | <.001 |
| Right medial frontal gyrus, BA25                          | 12 16 -18  | 3.41 |                         |       |
| Right insula, BA22                                        | 45 -28 -6  | 3.73 | 165                     | <.001 |
| Right insula, BA13                                        | 40 -21 -4  | 3.34 |                         |       |
| Left parahippocampal gyrus, BA34                          | -22 2 -15  | 3.47 | 152                     | <.001 |
| Left parahippocampal gyrus,<br>amygdala                   | -18 -6 -12 | 3.22 |                         |       |

<sup>a</sup> Location of nearest GM voxel. <sup>b</sup> See text for details of scale composition.
